# Supplementary material for: Upper arm length along with mid-upper arm circumference to enhance wasting prevalence estimation and diagnosis: sensitivity and specificity in 6–59-months-old children
Source: HighWire-hosted journal article supplement (doi:10.1136/fmch-2020-000748), 2021-06-01

Supplementary fig 1 : Receiver-operating characteristic (ROC) curve showing the sensitivity and 1-specificity of different MUAC cut-offs to diagnose wasting with WHZ < -2 as reference standard. Results are split to UALG1 (a), UALG2 (b) and UALG3 (c).

MUAC, mid-upper-arm circumference; UALG, upper arm length group; WHZ < -2, weight-for-height Z-score < -2.

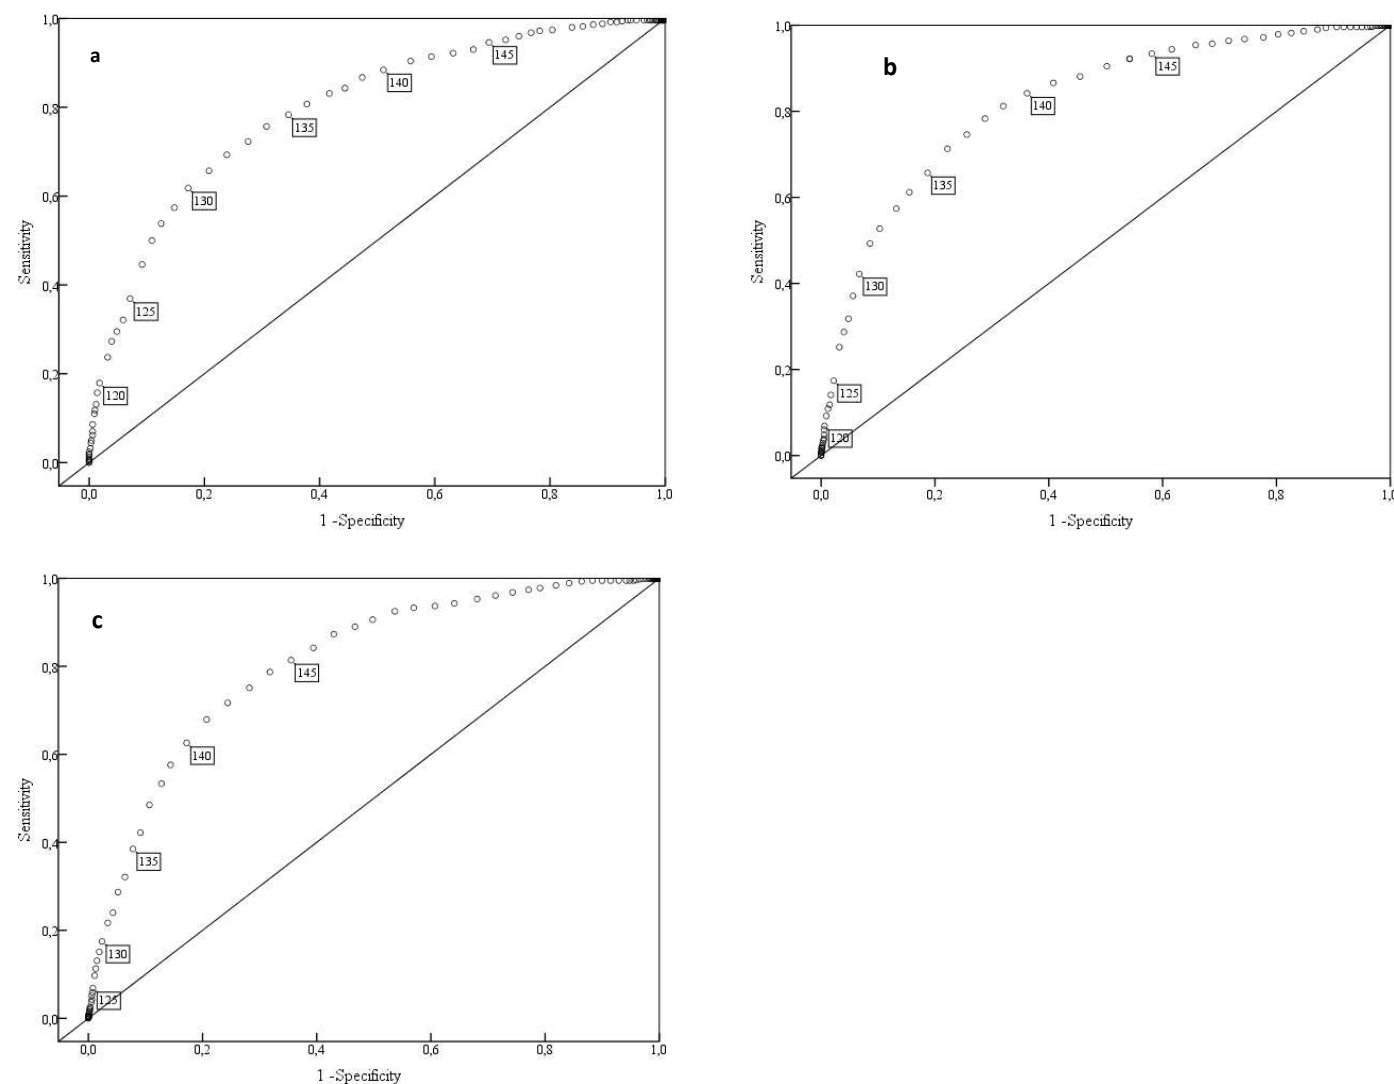

Supplement: fmch-2020-000748supp001_data_supplement.pdf [file fmch-2020-000748supp001_data_supplement.pdf]
